# Supplementary material for: The high-resolution crystal structure of a parallel intermolecular DNA G-4 quadruplex/drug complex employing syn glycosyl linkages
Source: PubMed Central journal article supplement — Nucleic Acids Res. 2012 Feb 28;40(12):5731–8. doi: 10.1093/nar/gks193 (PMC3384316; doi:10.1093/nar/gks193), 2012-02-28
Supplement: supp_gks193_nar-02867-f-2011-File007.pdf [file supp_gks193_nar-02867-f-2011-File007.pdf]

# The high resolution crystal structure of a parallel intermolecular DNA G-4 quadruplex/drug complex employing *syn* glycosyl linkages

George R. Clark, Patrycja D. Pytel and Christopher J. Squire

## SUPPLEMENTARY DATA

- Fig. S1 Final  $2F_o-F_c$  electron density map of G1 quadruplex layer
- Fig. S2 Final  $2F_o-F_c$  electron density map of daunomycin molecule
- (a) the planar chromophore
  - (b) the daunosamine moiety
- Fig. S3a Daunomycin layer stacking D9/D10
- Fig. S3b Daunomycin layer stacking D10/D11 with Na 20
- Fig. S4 A space-filling version of the full biological assembly of Figure 2. The grey atoms are the four layers of daunomycin molecules, the coloured atoms are individual d(GGGG) strands. The quadruplex grooves run diagonally across the top and bottom thirds of the diagram.

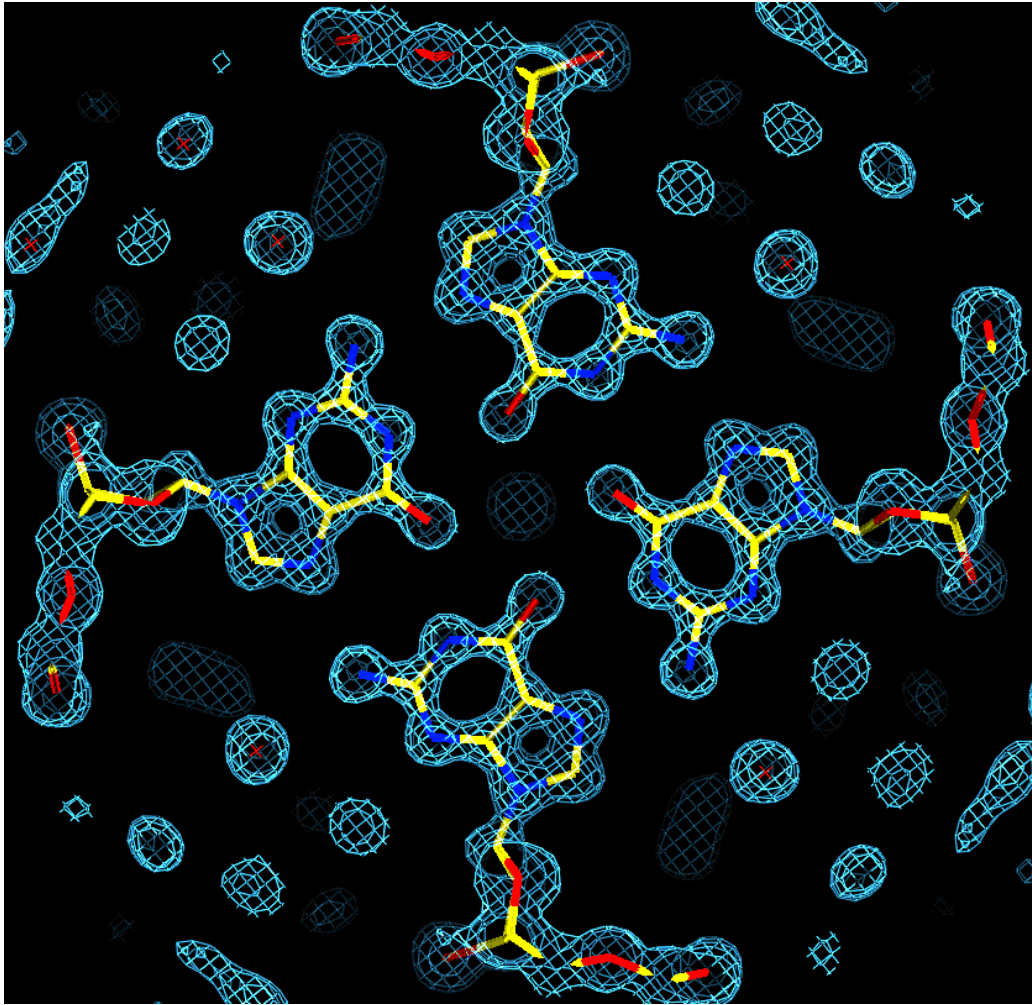

Fig. S1 Final  $2F_o - F_c$  electron density map of G1 quadruplex layer

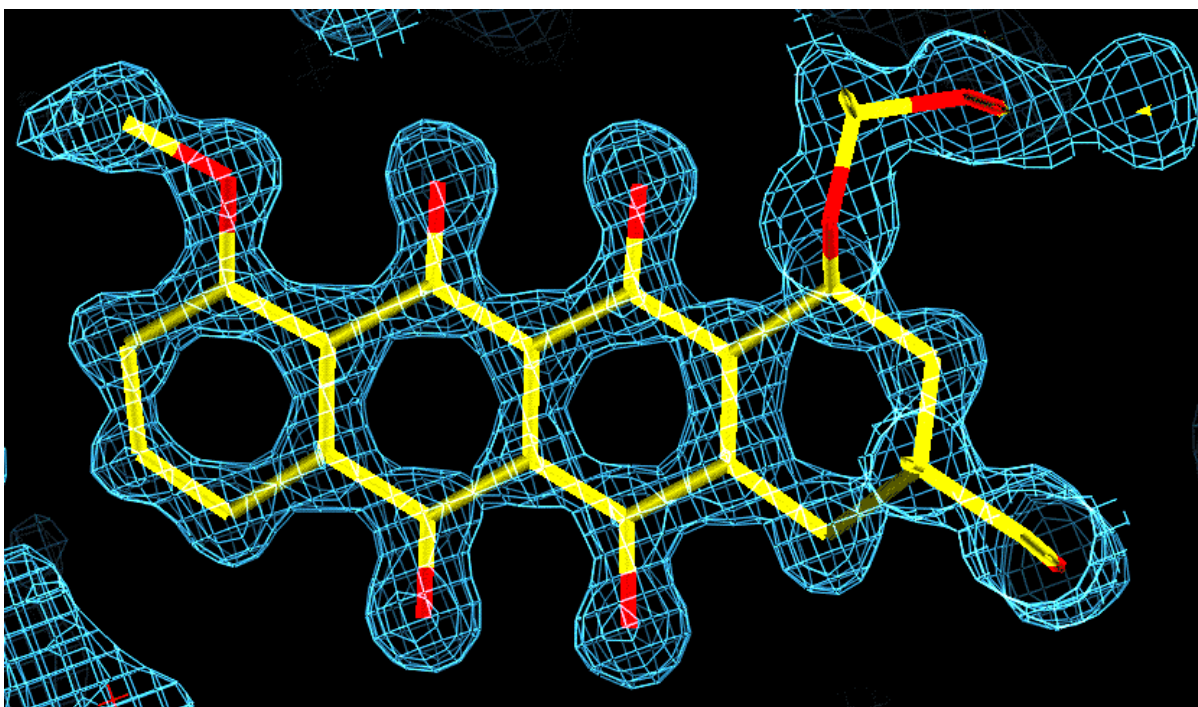

Fig. S2 Final  $2F_o - F_c$  electron density map of daunomycin molecule  
(a) the planar chromophore

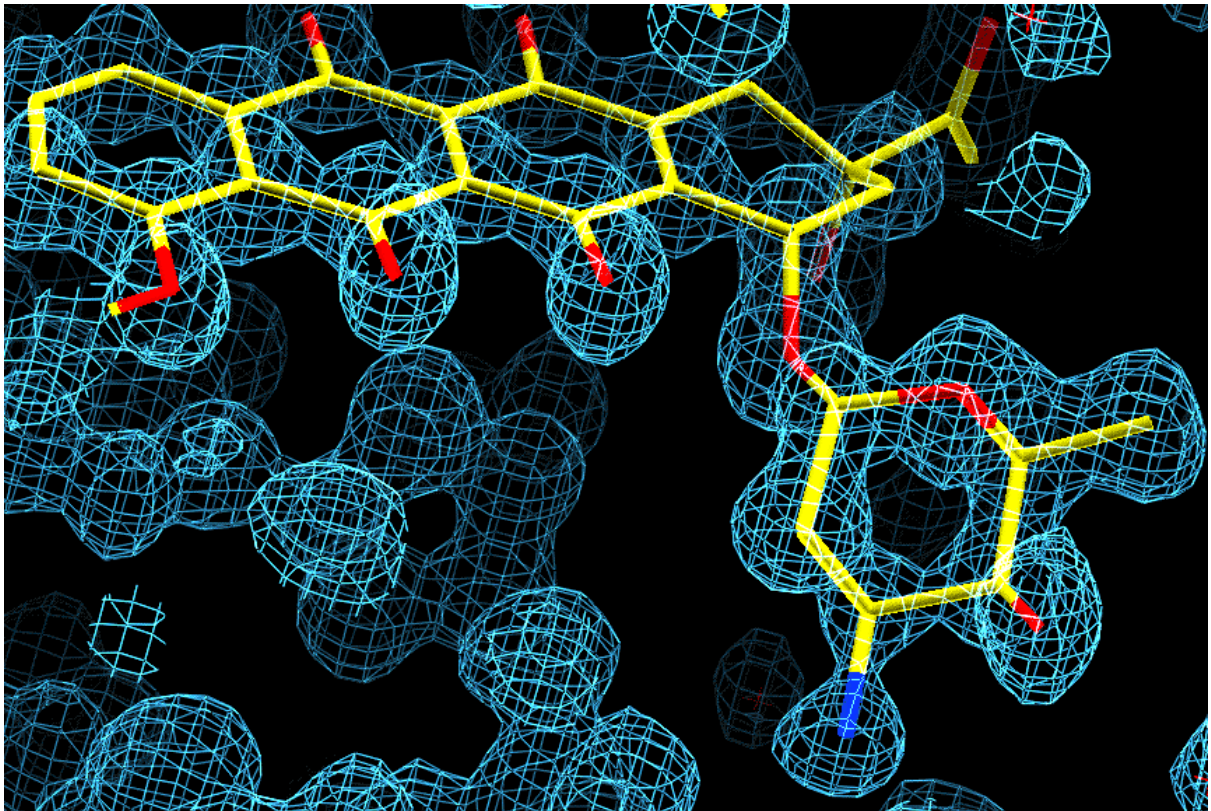

Fig. S2 Final  $2F_0-F_c$  electron density map of daunosamin molecule  
(b) the daunosamin moiety

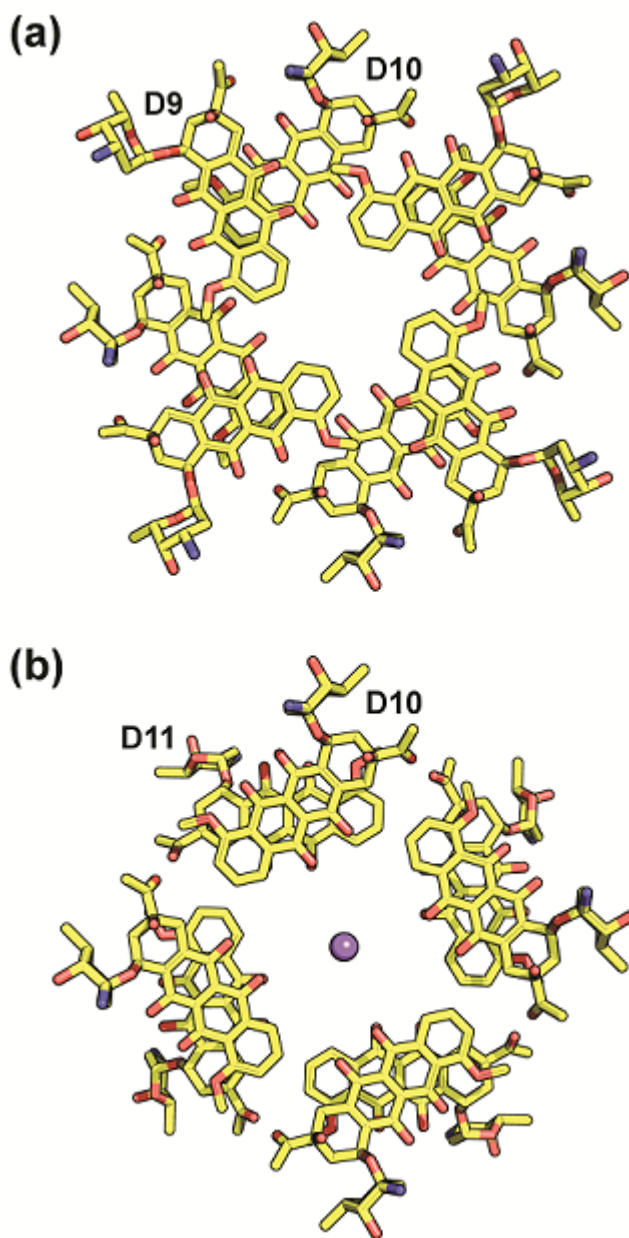

Fig. S3a Daunomycin layer stacking D9/D10  
Fig. S3b Daunomycin layer stacking D10/D11 with Na 20

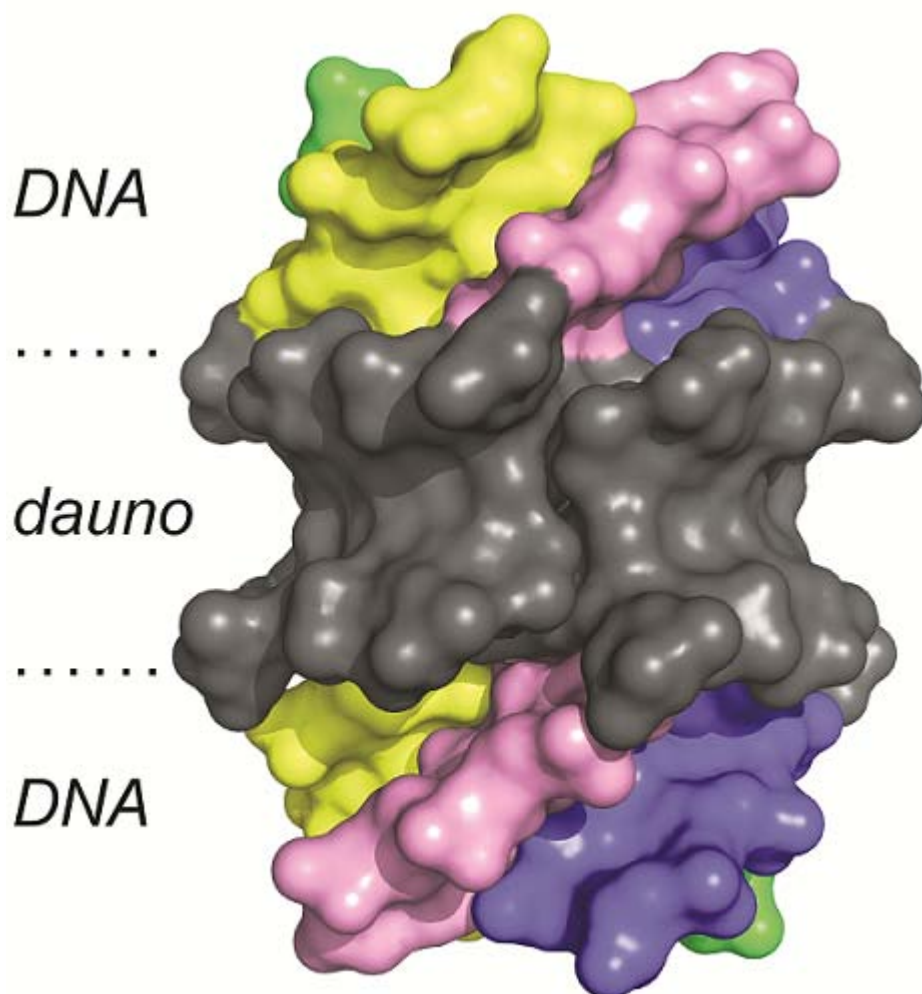

Fig. S4

A space-filling version of the full biological assembly of Figure 2. The grey atoms are the four layers of daunomycin molecules, the coloured atoms are individual d(GGGG) strands. The quadruplex grooves run diagonally across the top and bottom thirds of the diagram.
